# Supplementary material
Source: PubMed Central journal article supplement (PMC4272598)
Supplement: JB.02311-14_zjb999093446so1.pdf [file JB.02311-14_zjb999093446so1.pdf]

## SUPPLEMENTAL INFORMATION

In *Salmonella enterica*, the Gcn5-related acetyltransferase MddA (formerly YncA) acetylates methionine sulfone and methionine sulfoximine, blocking their toxic effects

**Kristy L. Hentchel and Jorge C. Escalante-Semerena\***

<sup>1</sup>*Department of Microbiology, University of Georgia, Athens, GA, 30602*

\*To whom correspondence should be addressed: E-mail: [jcescala@uga.edu](mailto:jcescala@uga.edu); Phone: (+1) 706-542-2651; Department of Microbiology, 212C Biological Sciences Building, Athens GA 30602-2605

Running title: MddA acetylates oxidized methionine in *S. enterica*

Keywords: Gcn5 related *N*-acetyltransferase, acetylation, methionine sulfoximine, methionine sulfone, YncA, MddA

Supplementary tables

| <b>Table S1. Strains and plasmids used in this study.</b> |                                                                                                                                |                                     |
|-----------------------------------------------------------|--------------------------------------------------------------------------------------------------------------------------------|-------------------------------------|
| <b>Strain</b>                                             | <b>Relevant genotype</b>                                                                                                       | <b>Reference/source<sup>a</sup></b> |
| JE10079                                                   | <i>ara-9 mddA<sup>+</sup></i>                                                                                                  | Laboratory strain                   |
| <b>Derivatives of JE10079</b>                             |                                                                                                                                |                                     |
| JE18333                                                   | <i>mddA1::cat<sup>+</sup></i>                                                                                                  |                                     |
| JE18543                                                   | <i>mddA1::cat<sup>+</sup> / pNK972<sup>b</sup></i>                                                                             |                                     |
| JE18622                                                   | $\Delta$ <i>mddA2</i>                                                                                                          |                                     |
| JE18955                                                   | pMDD8                                                                                                                          |                                     |
| JE18961                                                   | <i>mddA1::cat<sup>+</sup> / pMDD8</i>                                                                                          |                                     |
| JE19029                                                   | <i>mddA1::cat<sup>+</sup> / pMDD11</i>                                                                                         |                                     |
| JE19583                                                   | <i>metNI2703::kan<sup>+</sup></i>                                                                                              |                                     |
| JE19730                                                   | $\Delta$ <i>mddA2 metNI2703::kan<sup>+</sup></i>                                                                               |                                     |
| JE20027                                                   | $\Delta$ <i>mddA2 glnP1561::Tn10d(tet<sup>+</sup>)<sup>c</sup></i>                                                             |                                     |
| JE20064                                                   | <i>glnPQ1562::cat<sup>+</sup></i>                                                                                              |                                     |
| JE20065                                                   | $\Delta$ <i>mddA2 glnPQ1562::cat<sup>+</sup></i>                                                                               |                                     |
| JE20067                                                   | $\Delta$ <i>mddA2 metNI2703::kan<sup>+</sup> glnPQ1562::cat<sup>+</sup></i>                                                    |                                     |
| JE20073                                                   | $\Delta$ <i>mddA2 glnPQ1562::cat<sup>+</sup> / pGLN2</i>                                                                       |                                     |
| JE20329                                                   | $\Delta$ <i>mddA2 metNI2703::kan<sup>+</sup> / pMETN1</i>                                                                      |                                     |
| JE6583                                                    | <i>metE205 ara-9</i>                                                                                                           | K. Sanderson via J. Roth            |
| <b><i>E. coli</i> strains</b>                             |                                                                                                                                |                                     |
| <i>E. coli</i> C41(IDE3)                                  | <i>ompT hsdS</i> (r <sub>B</sub> m <sub>B</sub> ) <i>gal</i> $\lambda$ (DE3) including at least one non-characterized mutation | (1, 2)                              |
| <b>Plasmids</b>                                           |                                                                                                                                |                                     |
| pMDD7                                                     | <i>mddA<sup>+</sup></i> cloned into pKLD66 <sup>d</sup>                                                                        |                                     |

|        |                                                                                |     |
|--------|--------------------------------------------------------------------------------|-----|
| pMDD8  | <i>mddA</i> <sup>+</sup> cloned into pBAD24 <sup>e</sup>                       |     |
| pMDD10 | <i>mddA3</i> cloned into pKLD66 <sup>d</sup> (encodes MddA <sup>E82Q</sup> )   |     |
| pMDD11 | <i>mddA3</i> cloned into pBAD24 <sup>e</sup> , (encodes MddA <sup>E82Q</sup> ) |     |
| pGLN2  | <i>glnPQ</i> <sup>+</sup> cloned into pBAD24 <sup>e</sup>                      |     |
| pMETN1 | <i>metNI</i> <sup>+</sup> cloned into pBAD24 <sup>e</sup>                      |     |
| pNK972 | <i>tpn</i> <sup>+</sup> <i>bla</i> <sup>+</sup>                                | (3) |

<sup>a</sup> All strains and plasmids were constructed during the course of this work, unless otherwise stated

<sup>b</sup> pNK972 is a pBR332 derivative carrying the IS10transposase gene described in (3)

<sup>c</sup> Tn10d(*tet*<sup>+</sup>) is an abbreviation of Tn10Δ16Δ17 (4)

<sup>d</sup> pKLD66 is an overexpression vector described in (2)

<sup>e</sup> pBAD24 is a cloning vector described in (5)

| <b>Table S2. Primers used in this study.</b> |                                                               |
|----------------------------------------------|---------------------------------------------------------------|
| <b>Primer Name</b>                           | <b>Primer Sequence</b>                                        |
| <b>Cloning</b>                               |                                                               |
| 5' <i>glnPQ</i> pBAD24                       | NNGCTCTTCNTTCATGCAGTTTGACTGGAGCGCCATCT                        |
| 3' <i>glnPQ</i> pBAD24                       | NNGCTCTTCNTTATCAGGAGACGTGCTGTAAAAATTCC                        |
| 5' <i>metNI</i> pBAD24                       | NNGCTCTTCNTTCATGATTAAACTTTCGAATATTACCA                        |
| 3' <i>metNI</i> pBAD24                       | NNGCTCTTCNTTATTACTTATGCGTGACAGCCCTGACG                        |
| 5' <i>mddA</i> pBAD24                        | NNGCTCTTCNTTCATGACGATTCGCTTTGCCGATAAAG                        |
| 3' <i>mddA</i> pBAD24                        | NNGCTCTTCNTTATCAGCAGGCGTCCGGCGCGGGCGTGT                       |
| 5' <i>mddA</i> pTEV16                        | NNGCTCTTCNAGCATGACGATTCGCTTTGCCGATAAAG                        |
| 3' <i>mddA</i> pTEV16                        | NNGCTCTTCNTTATCAGCAGGCGTCCGGCGCGGGCGTGT                       |
| <b>Mutagenesis</b>                           |                                                               |
| 5' <i>mddA</i> G244C                         | GTTTTTCGCTATACCGTCCAGCACTCGGTTTATGTTC                         |
| 3' <i>mddA</i> G244C                         | GAACATAAACCGAGTGCTGGACGGTATAGCGAAAAC                          |
| <b>Strain deletions</b>                      |                                                               |
| 5' <i>glnPQ</i> DEL                          | TGACTATTTACACCACGGTAACAGGAACGACATATGGTGTAGGCTGG<br>AGCTGCTTC  |
| 3' <i>glnPQ</i> DEL                          | CCCTTCCTGCCGCAGGGCTGGAAGGGCGATATCTCACATATGAATAT<br>CCTCCTTAG  |
| 5' <i>metNI</i> DEL                          | CTCCGCTCATTTCATTACGATAATAAAGAATCAATGGTGTAGGCTGG<br>AGCTGCTTC  |
| 3' <i>metNI</i> DEL                          | TTTCCTTAATGAGTATTTGTGTTGTGTTTAAACGTTACATATGAATATCC<br>TCCTTAG |
| 5' <i>mddA</i> DEL                           | TATCGTAAACATTCCCTGGGGTTCCTATGGTGTAGGCTGGAGCTGCT<br>TC         |
| 3' <i>mddA</i> DEL                           | AAAAGATGAGCGTC<br>GCGACTGGTTCATCACATATGAATATCCTCCTTAG         |

## Supplementary figures

**Figure S1. High levels of MddA<sup>E82Q</sup> variant allow an *mddA1::cat*<sup>+</sup> strain to grow in the presence of MSX.** Growth of the *S. enterica* strain *mddA1::cat*<sup>+</sup> / pMDD11 (encodes MddA<sup>E82Q</sup>) in NCE minimal medium (glycerol, 22 mM) was examined in the presence of MSX (10  $\mu$ M) and increasing concentrations of inducer (L-(+)-arabinose; 250  $\mu$ M, 500  $\mu$ M, and 1000  $\mu$ M), as indicated. Growth curves were performed using a microplate reader (Bio-Tek Instruments) as described under *Materials and Methods*. The strain analyzed was JE19029 (*mddA1::cat*<sup>+</sup> / pMDD11 *mddA3*<sup>+</sup>, which encodes MddA<sup>E82Q</sup>). Error bars represent standard deviation.

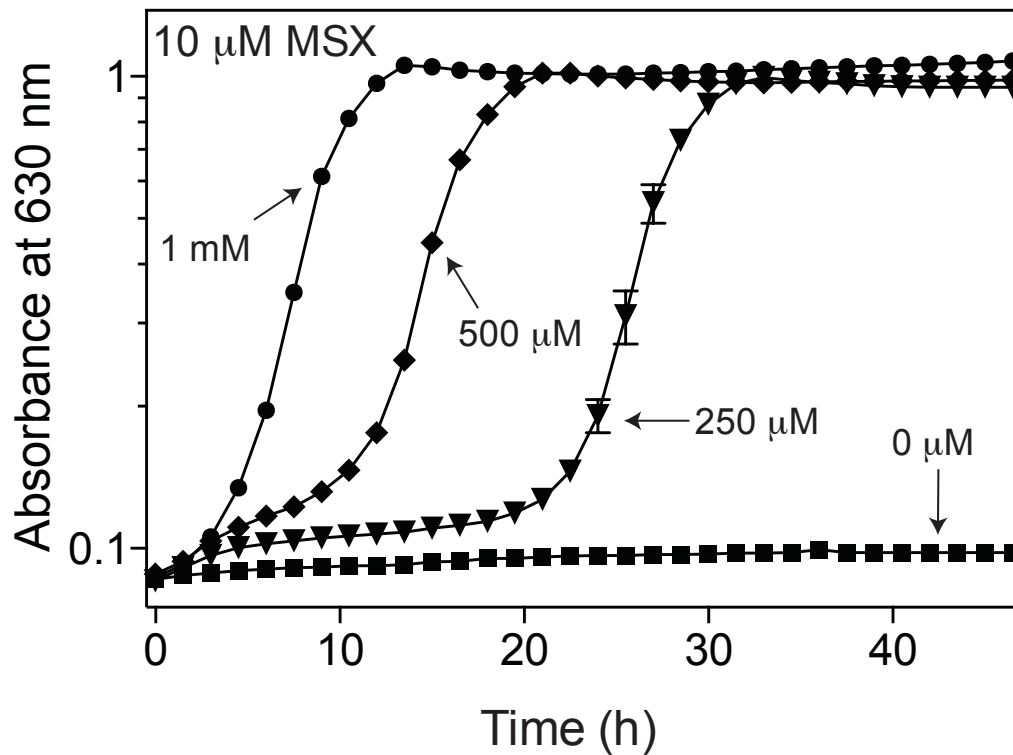

**Supplemental Figure 2. Addition of glutamine fully restores growth of an *mddA* strain exposed to MSX and MSO in rich medium.** Growth of the *S. enterica* strains *mddA*<sup>+</sup> and *mddA1::cat*<sup>+</sup> was examined with (A) MSX (50  $\mu$ M) and (B) MSO (100  $\mu$ M), with the addition of glutamine (200  $\mu$ M). The medium used was nutrient broth. Growth curves were performed using a microplate reader (Bio-Tek Instruments) as described under *Materials and Methods*. The following strains were analyzed: *mddA*<sup>+</sup> (JE10079) and *mddA1::cat*<sup>+</sup> (JE18333). Error bars represent standard deviation.

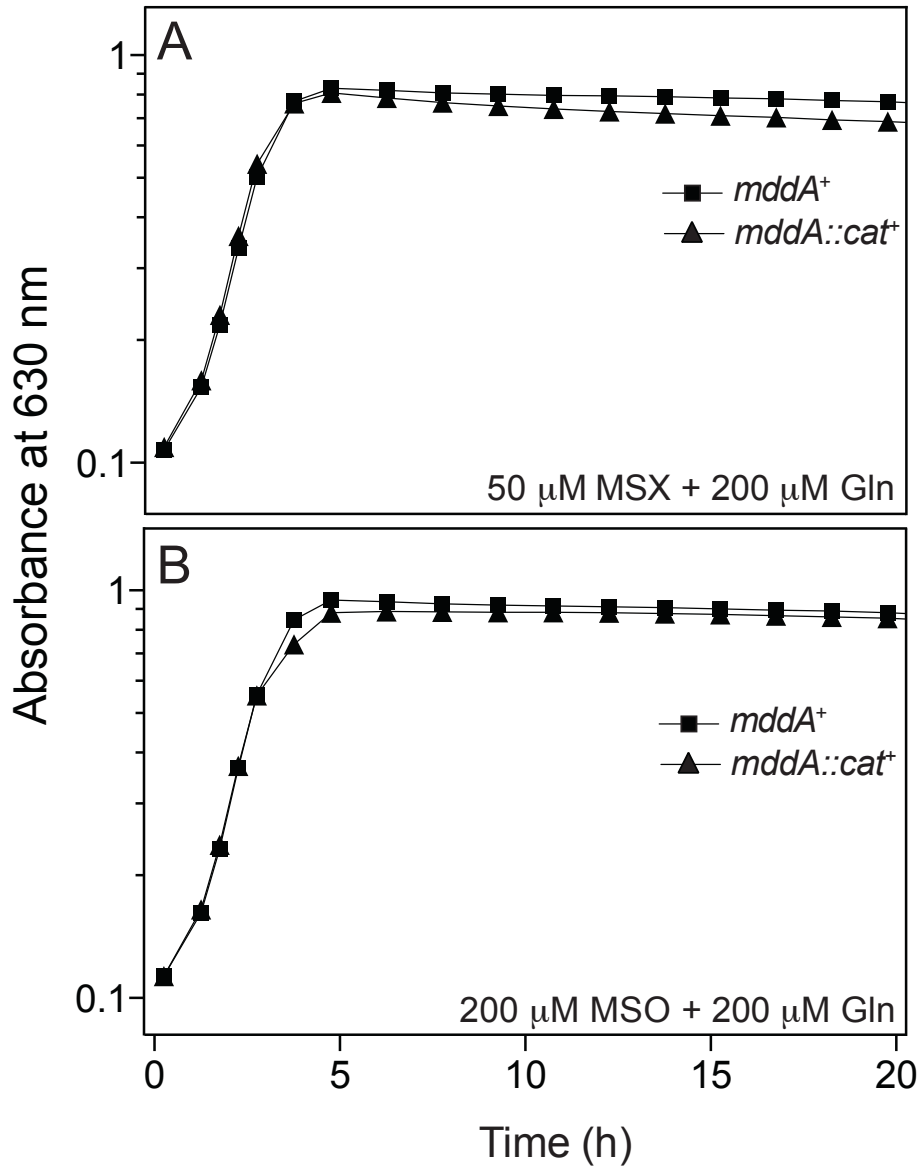

**Supplemental Figure 3. *SeMddA*<sup>WT</sup> acetylates methionine derivatives.** The substrate specificity of *SeMddA*<sup>WT</sup> was examined using thin layer chromatography. Reactions included 1 µg of *SeMddA*<sup>WT</sup> or *SeMddA*<sup>E82Q</sup> (neg. ctrl), [<sup>14</sup>C]-acetyl-CoA, and 0.5 mM of substrate. After exposure of the TLC plate to a phosphor screen the resulting image was detected using a Typhoon Trio+ Variable Mode Imager (GE Healthcare).

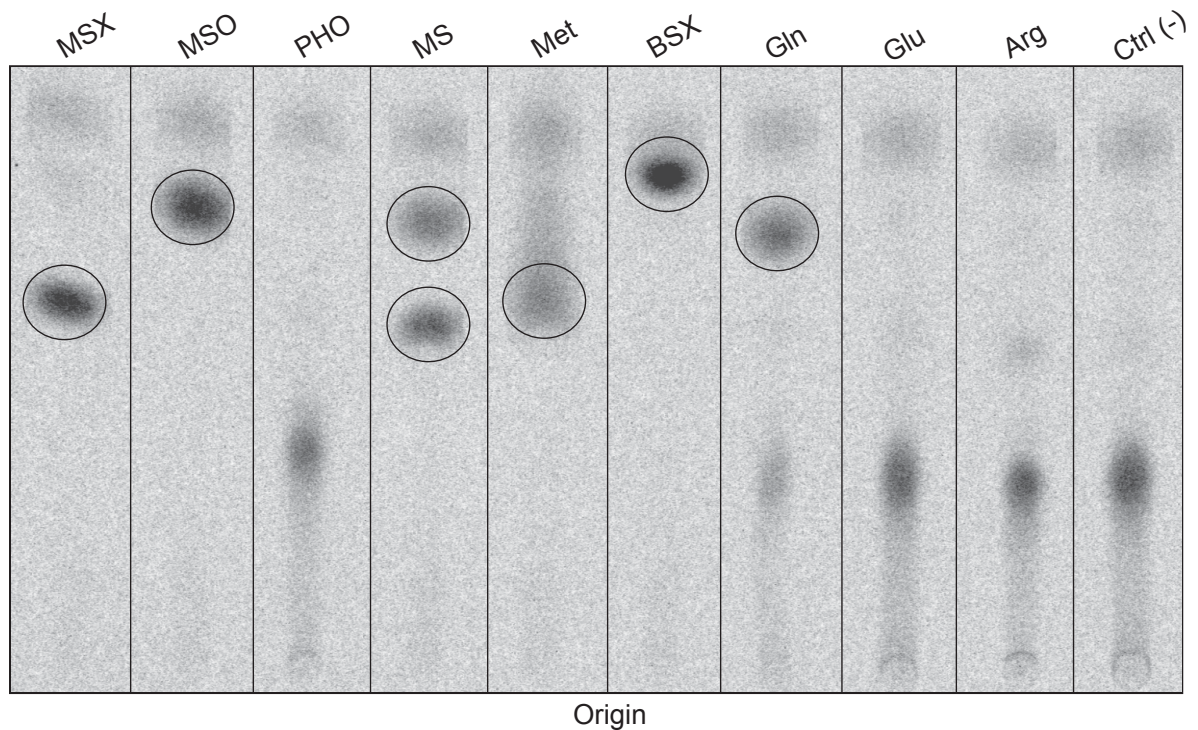

#### Supplementary references

1. **Miroux B, Walker JE.** 1996. Over-production of proteins in *Escherichia coli*: mutant hosts that allow synthesis of some membrane proteins and globular proteins at high levels. *J. Mol. Biol.* **260**:289-298.
2. **Rocco CJ, Dennison KL, Klenchin VA, Rayment I, Escalante-Semerena JC.** 2008. Construction and use of new cloning vectors for the rapid isolation of recombinant proteins from *Escherichia coli*. *Plasmid* **59**:231-237.
3. **Bender J, Kleckner N.** 1986. Genetic-evidence that *Tn10* transposes by a non-replicative mechanism. *Cell* **45**:801-815.
4. **Way JC, Kleckner N.** 1984. Essential sites at transposon *Tn 10* termini. *Proc. Natl. Acad. Sci. U S A* **81**:3452-3456.
5. **Guzman LM, Belin D, Carson MJ, Beckwith J.** 1995. Tight regulation, modulation, and high-level expression by vectors containing the arabinose PBAD promoter. *J. Bacteriol.* **177**:4121-4130.
